# Supplementary material for: Loss of tumorigenic potential upon transdifferentiation from keratinocytic into melanocytic lineage
Source: PubMed Central journal article supplement (PMC4937495; doi:10.1038/srep28891), 2016-07-08
Supplement: srep28891-s1.pdf [file srep28891-s1.pdf]

## Supplement

### Loss of tumorigenic potential upon transdifferentiation from keratinocytic into melanocytic lineage

Sabrina Fehrenbach 1,2, Daniel Novak 1,2, Mathias Bernhardt 1,2, Lionel Larribere 1,2, Petra Boukamp 3,4, Viktor Umansky 1,2, Jochen Utikal 1,2,\*

1 Skin Cancer Unit, German Cancer Research Center (DKFZ), 69121 Heidelberg, Germany

2 Department of Dermatology, Venereology and Allergology, University Medical Center Mannheim, Ruprecht-Karl University of Heidelberg, 68167 Mannheim, Germany

3 Genetics of Skin Carcinogenesis, German Cancer Research Center (DKFZ), 69121 Heidelberg, Germany

4 IUF–Leibniz Research Institute for Environmental Medicine, 40021 Düsseldorf, Germany.

**Supplementary Figure 1:** A) Scheme of lentiviral vector constructs. Vectors carrying the transdifferentiation factors also harbor RFP to visualize transgene expression. The MITF promoter was linked to GFP to make endogenous MITF expression visible with this reporter construct. B) Validation of the functionality of the melanocyte-specific reporter construct. 12 days after infection with the reporter construct reporter activity was observed in melanocytes as indicated by strong GFP signal. No activity of the melanocyte-specific reporter construct was detectable in HaCaT cells and MET-4 cells 12 days after infection. C) Endogenous (endo) and total expression of the four transcription factors MITF, SOX10, SOX9 and LEF1 with and without induction with doxycycline in MET-4 cells. Error bars depict the SD of three independent experiments. P values were calculated by two-tailed, paired sample t-test. Asterisks indicate t-test p-value <0.05 (\*\* p-value <0.01, \*\*\* p-value <0.005).

**Supplementary Figure 2:** A) MITF alone is not sufficient to induce neither MITF reporter activity nor morphological changes in MET-4 cells. MET-4 cells could not be cultured in the melanocyte medium MCDB. These cells died within a week in the MCDB medium. B) Strong RFP signal was observed in MET-4 cells after transfection with the transdifferentiation factors MITF, LEF-1, SOX9 and SOX10 and induction with doxycycline. After doxycycline withdrawal RFP signal was absent indicating a complete shutdown of transgene expression. However, the cells retained their changed morphology.

**Supplementary Figure 3:** Overview of senescence marker expression in MET-4 and MT-MET-4 (TD) cells

**Supplementary Figure 4:** IL-24 mRNA expression in MET-4 cells and MT-MET-4 cells cultured with and without TPA.

## Supplementary Figure 1

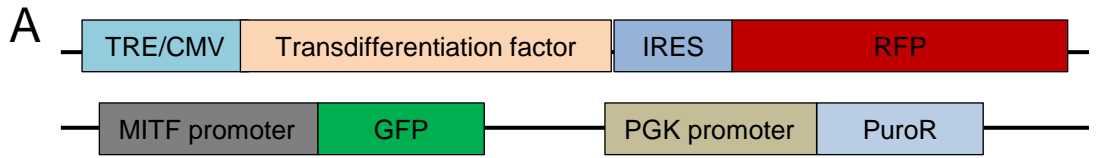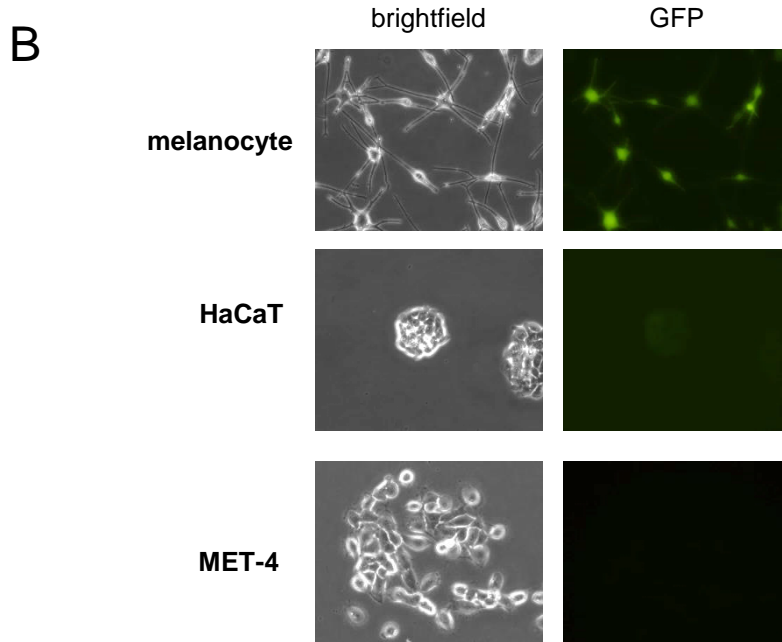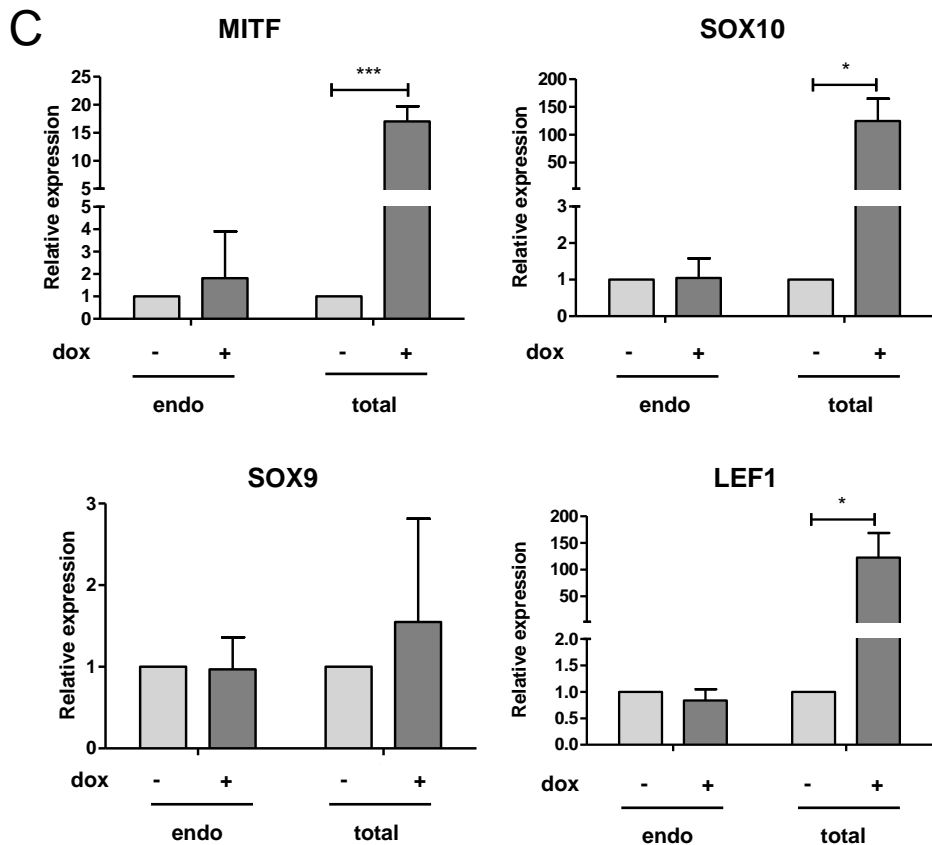

## Supplementary Figure 2

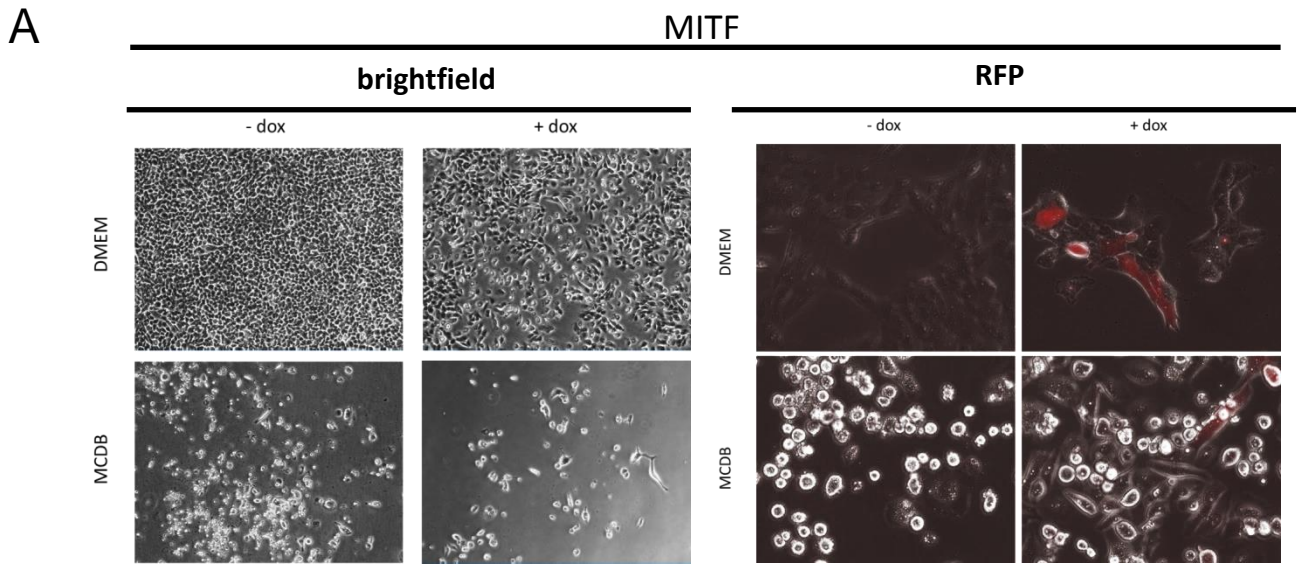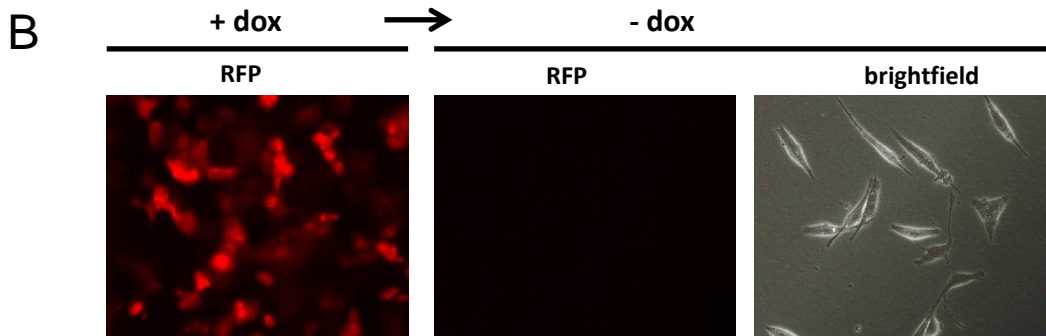

## Supplementary Figure 3

A

|          | -1<FC<+1 | MET4  | TD |
|----------|----------|-------|----|
| ABL1     | 9,31     | 9,46  |    |
| ARNTL    | 6,75     | 6,96  |    |
| BCL2L12  | 7,16     | 7,15  |    |
| BCL6     | 6,54     | 6,54  |    |
| BMPR1A   | 6,71     | 6,54  |    |
| C2orf40  | 6,47     | 6,48  |    |
| CALR     | 11,24    | 11,09 |    |
| CAV1     | 13,00    | 12,94 |    |
| CDK6     | 10,91    | 10,63 |    |
| CDKN1A   | 6,53     | 6,58  |    |
| CDKN2A   | 6,53     | 6,69  |    |
| H2AFX    | 9,92     | 10,19 |    |
| HMGA1    | 6,74     | 6,87  |    |
| HMGA2    | 6,76     | 7,15  |    |
| HRAS     | 9,79     | 9,18  |    |
| ING2     | 9,08     | 9,35  |    |
| KAT6A    | 8,15     | 8,29  |    |
| MAGEA2   | 6,44     | 6,41  |    |
| MAP2K1   | 10,44    | 9,63  |    |
| MAPK14   | 6,89     | 7,44  |    |
| MAPKAPK5 | 9,07     | 9,82  |    |
| NEK4     | 6,69     | 6,82  |    |
| NEK6     | 9,15     | 8,63  |    |
| NSMCE2   | 9,49     | 9,09  |    |
| NUAK1    | 10,24    | 9,78  |    |
| OPA1     | 8,28     | 8,74  |    |
| PLA2R1   | 6,91     | 6,51  |    |
| PML      | 7,03     | 6,77  |    |
| PNPT1    | 7,37     | 7,90  |    |
| PRKCD    | 9,20     | 8,40  |    |
| PRKDC    | 9,61     | 10,64 |    |
| PRMT6    | 8,46     | 8,96  |    |
| RSL1D1   | 10,34    | 11,12 |    |
| SIRT1    | 7,87     | 7,47  |    |
| SMC5     | 6,57     | 6,48  |    |
| SMC6     | 7,03     | 7,27  |    |
| SRF      | 10,37    | 10,16 |    |
| TBX2     | 6,45     | 6,69  |    |
| TBX3     | 6,59     | 6,66  |    |
| TERF2    | 7,91     | 8,08  |    |
| TP53     | 7,79     | 7,96  |    |
| TWIST1   | 9,40     | 10,32 |    |
| ULK3     | 6,82     | 6,96  |    |
| VASH1    | 6,82     | 6,51  |    |
| WNT16    | 6,68     | 6,60  |    |
| ZKSCAN3  | 7,24     | 7,41  |    |
| ZNF277   | 7,62     | 7,77  |    |

cellular senescence-associated genes (GO:0090398)

B

|        | -1<FC<+1 | MET4  | TD |
|--------|----------|-------|----|
| CCL13  | 6,61     | 6,84  |    |
| CCL2   | 6,49     | 6,54  |    |
| CCL27  | 6,63     | 6,59  |    |
| CCL3   | 6,62     | 6,60  |    |
| CCL8   | 6,67     | 6,61  |    |
| CSF3   | 6,61     | 6,96  |    |
| CXCL12 | 6,46     | 6,62  |    |
| CXCL13 | 6,52     | 6,53  |    |
| CXCL2  | 9,31     | 10,23 |    |
| IFNG   | 6,41     | 6,44  |    |
| IGFBP7 | 12,06    | 11,78 |    |
| IL13   | 6,42     | 6,45  |    |
| IL1B   | 10,31    | 10,57 |    |
| IL7    | 6,55     | 6,52  |    |
| IL8    | 8,37     | 8,51  |    |

SASP-associated genes

## Supplementary Figure 4

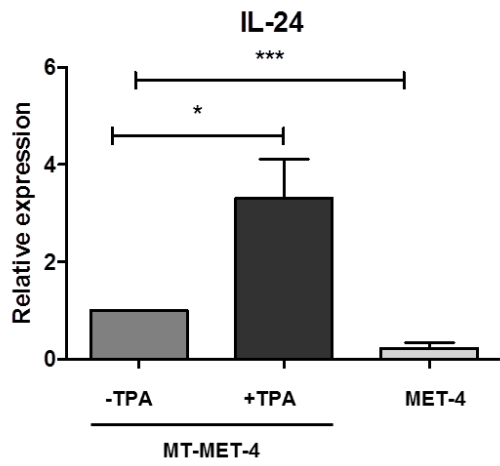

**Suppl. Table 1:** Candidate transcription factors used for transdifferentiation from keratinocytic into melanocytic lineage

| <b>Candidate transcription factors for transdifferentiation</b> |                |        |                |
|-----------------------------------------------------------------|----------------|--------|----------------|
| MITF-M                                                          | NM_000248.3    | cMET   | XM_011516223.1 |
| SOX2                                                            | NM_003106.3    | TFAP2A | NM_003220.2    |
| SOX5                                                            | XM_011520846.1 | NFIX   | NM_002501.3    |
| SOX9                                                            | NM_000346.3    | IRF4   | NM_002460.3    |
| SOX10                                                           | NM_006941.3    | ETS1   | NM_005238.3    |
| LEF1                                                            | NM_016269.4    | FOSB   | NM_006732.2    |
| $\beta$ -catenin                                                | XM_005264886.2 | HAND1  | NM_004821.2    |
| PAX3A                                                           | NM_000438.5    | HES1   | NM_005524.3    |
| PAX3B                                                           | NM_013942.4    | HOXB7  | NM_004502.3    |
| PAX3C                                                           | NM_181457.3    | IFI16  | NM_005531.2    |
| PAX3D                                                           | NM_181458.3    | KLF9   | NM_001206.2    |
| PAX3I                                                           | NM_001127366.2 | PITX1  | NM_002653.4    |
| SNAI2                                                           | NM_003068.4    |        |                |

**Suppl. Table 2: Q-PCR primers**

| <b>Q-PCR Primer</b>     | <b>Forward primer</b>         | <b>Reverse primer</b>         |
|-------------------------|-------------------------------|-------------------------------|
| <b>MITF</b>             | GCTCACAGCGTGTATTTTTCC         | GCTCACAGCGTGTATTTTTCC         |
| <b>DCT</b>              | GGTTCCTTTCTCCCTCCAG           | GGTTCCTTTCTCCCTCCAG           |
| <b>TRP1</b>             | AGCAGTAGTTGGCGCTTTGT          | AGCAGTAGTTGGCGCTTTGT          |
| <b>TYR</b>              | TTGTACTIONCCTGCTGTGGAG        | TTGTACTIONCCTGCTGTGGAG        |
| <b>K10</b>              | GCTGACCTGGAGATGCAAAT          | GCTGACCTGGAGATGCAAAT          |
| <b>K14</b>              | AGGAGGTCACATCTCTGGATGACTG     | AGGAGGTCACATCTCTGGATGACTG     |
| <b>Integrin beta 4</b>  | CTGTACCCGTATTGCGACT           | CTGTACCCGTATTGCGACT           |
| <b>Integrin alpha 6</b> | GCTGGTTATAATCCTTCAATATCAATTGT | GCTGGTTATAATCCTTCAATATCAATTGT |
| <b>Loricrin</b>         | GGAGTTGGAGGTGTTTTCCA          | GGAGTTGGAGGTGTTTTCCA          |
| <b>Involucrin</b>       | CTCCATGTGTCATGGGATATG         | CTCCATGTGTCATGGGATATG         |
| <b>IL-24</b>            | GACTTTAGCCAGCAGACCCTT         | GGTTGCAGTTGTGACACGAT          |
| <b>18S</b>              | GAGGATGAGGTGGAACGTGT          | GAGGATGAGGTGGAACGTGT          |
| <b>MITF endo</b>        | ACCGTCTCTCACTGGATTGG          | CGTTGGGCTTGCTGTATGTG          |
| <b>MITF total</b>       | TGCCTGTCTCGGAAACTTG           | CCAGTGCTCTTGCTTCAGAC          |
| <b>SOX9 endo</b>        | AGACCTTTGGGCTGCCTTAT          | TAGCCTCCCTCACTCCAAGA          |
| <b>SOX9 total</b>       | CTGAGCAGCGACGTCATCTC          | GTTGGGCGGCAGGTACTIONG         |
| <b>SOX10 endo</b>       | GGCTTTCTGTCTGGCTCACTION       | TAGAGGGTCATTCCTGGGGG          |
| <b>SOX10 total</b>      | AGCCCAGGTGAAGACAGAGA          | ATAGGGTCCTGAGGGCTGAT          |
| <b>LEF1 endo</b>        | GCATCAGGTACAGGTCCAAGA         | TCTCCAGAAGAGGTCTCTGGG         |
| <b>LEF1 total</b>       | AGAGCGAATGTCGTTGCTGA          | TCTTGGACCTGTACCTGATGC         |
